# Supplementary material for: Magnetic exchange coupling and photodetection multifunction characteristics of an MnSe/LaMnO3 heterostructure
Source: Royal Society of Chemistry journal article supplement (doi:10.1039/d4ra06719c), 2025-01-01
Supplement: d4ra06719c1.pdf [file d4ra06719c1.pdf]

## Supporting Information

### **The magnetic exchange coupling and photodetection multifunction characteristics in MnSe/LaMnO<sub>3</sub> heterostructure**

Ye Zhao<sup>1†</sup>, Xingguo Gao<sup>1†</sup>, Ruilong Yang<sup>1,2</sup>, Ke Yang<sup>1</sup>, Jiarui Dou<sup>1</sup>, Jinzhong Guo<sup>1</sup>, Xiaoting Yang<sup>1</sup>, Guowei Zhou<sup>1,2,\*</sup>, and Xiaohong Xu<sup>1,2,\*</sup>

<sup>1</sup> School of Chemistry and Materials Science of Shanxi Normal University & Key Laboratory of Magnetic Molecules and Magnetic Information Materials of Ministry of Education, Taiyuan 030006, China

<sup>2</sup> Research Institute of Materials Science of Shanxi Normal University & Collaborative Innovation Center for Shanxi Advanced Permanent Magnetic Materials and Technology, Taiyuan 030006, China

† These authors contributed equally to this paper.

\* Corresponding author (email: [zhougw@sxnu.edu.cn](mailto:zhougw@sxnu.edu.cn); [xuxh@sxnu.edu.cn](mailto:xuxh@sxnu.edu.cn))

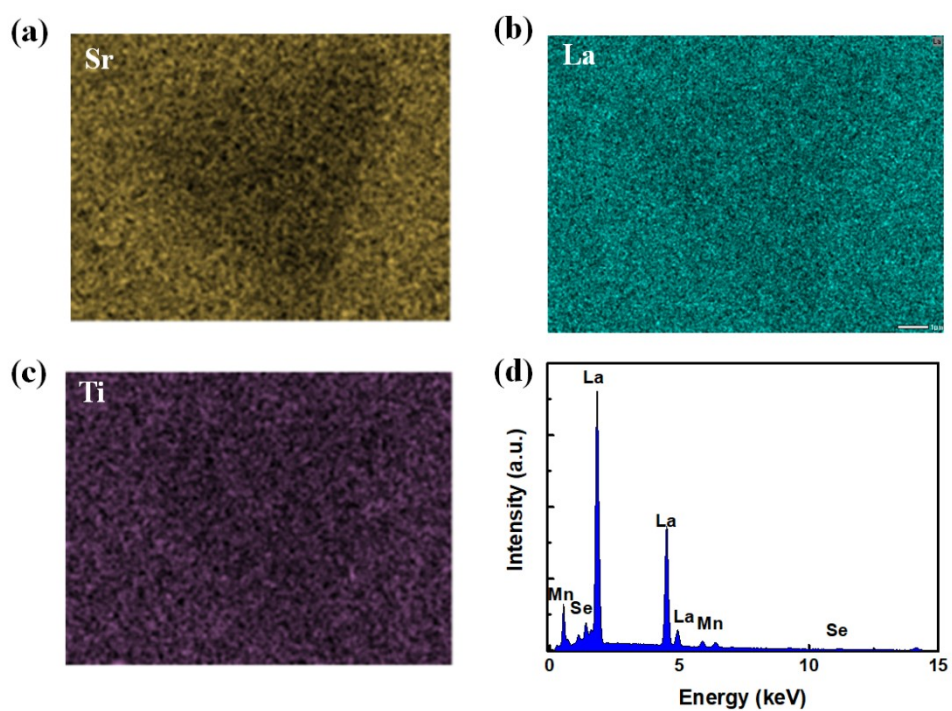

Figure S1 (a-b) The Sr and La elemental images of MnSe/LMO heterostructure. The triangular shape is blurry due to the thinner thickness of MnSe nanosheet. (c) The Ti elemental image of STO substrates. (d) The SEM-EDS analysis of MnSe/LMO heterostructure on grids.

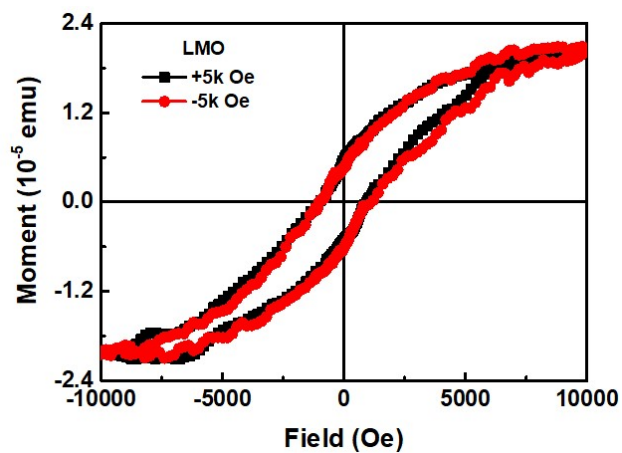

Figure S2 The different cooling field magnetic hysteresis loops of single LMO film along in-plane direction at 10 K, respectively.

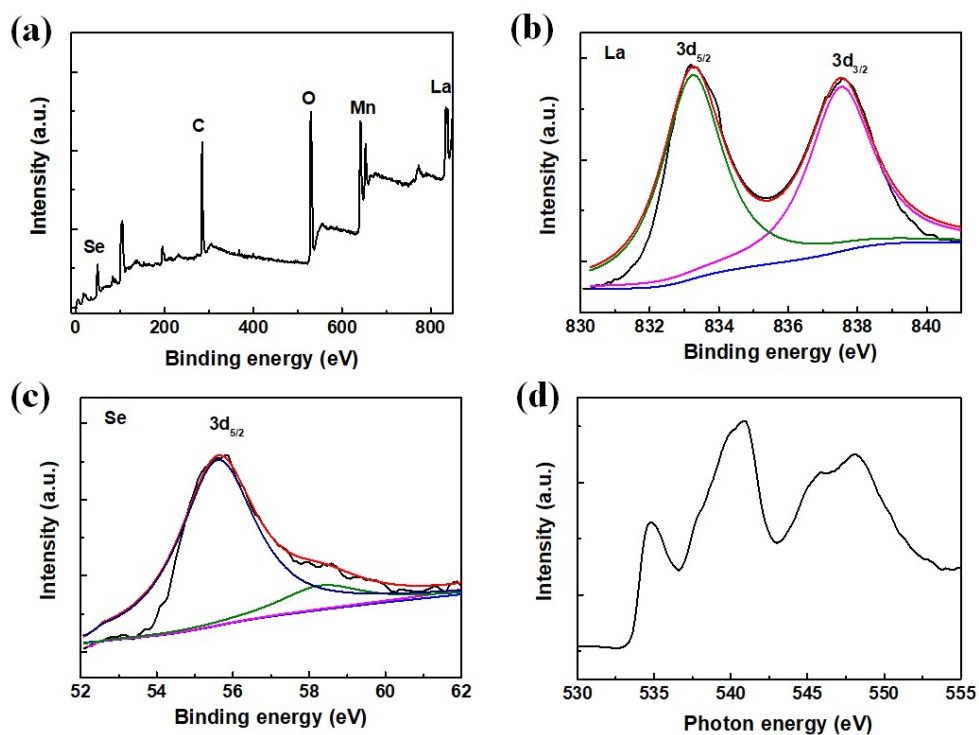

Figure S3 (a) The full spectrum diagram of MnSe/LMO heterostructure, where the La, Mn, Se elements can be observed. (b-c) The XPS fine spectra of La 3d and Se 3d orbitals, respectively. (d) The X-ray absorption spectroscopy of O element for MnSe/LMO heterostructure.
